# Supplementary material for: A fluorescent probe for sensing ferric ions in bean sprouts based onl-histidine-stabilized gold nanoclusters
Source: Royal Society of Chemistry journal article supplement (doi:10.1039/c4ay02186j), 2014-11-26
Supplement: c4ay02186j1.pdf [file c4ay02186j1.pdf]

# Supporting information

## Fluorescent probe for sensing ferric ions in bean sprouts based on L-histidine-stabilized gold nanoclusters

**Yuan Su**<sup>1,2</sup>, **Li Qi**<sup>2,\*</sup>, **Xiaoyu Mu**<sup>2,3</sup>, **Minglin Wang**<sup>1,\*</sup>

<sup>1</sup> Graduate School, Shandong Agricultural University, Shandong 271018, P. R. China

<sup>2</sup> Beijing National Laboratory for Molecular Sciences; Key Laboratory of Analytical Chemistry for Living Biosystems, Institute of Chemistry, Chinese Academy of Sciences, Beijing 100190, P. R. China

<sup>3</sup> Graduate School, University of Chinese Academy of Sciences, 19A Yuquanlu, Beijing 100049, P. R. China

\* Correspondence:

**qili@iccas.ac.cn**

**mlwang@sdau.edu.cn**

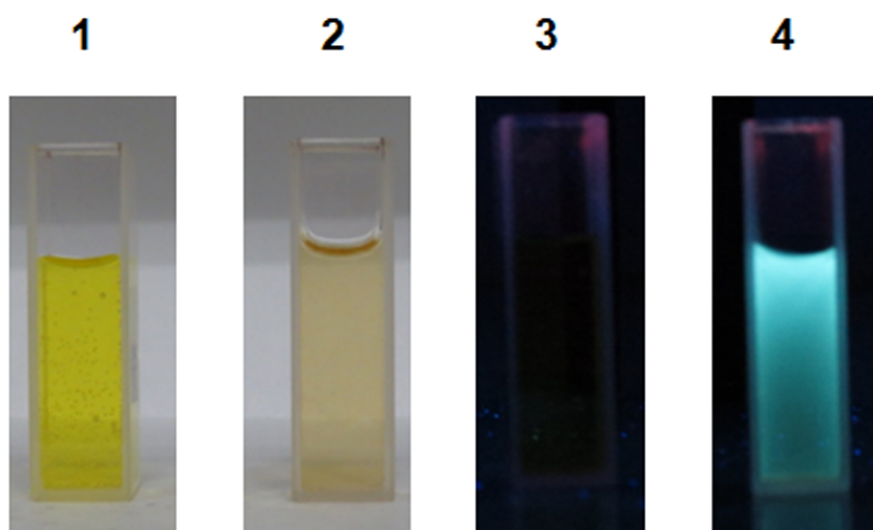

**Fig. S1.** Photographs under daylight (1, 2) and 365 nm UV light irradiation (3, 4) of Au NCs.

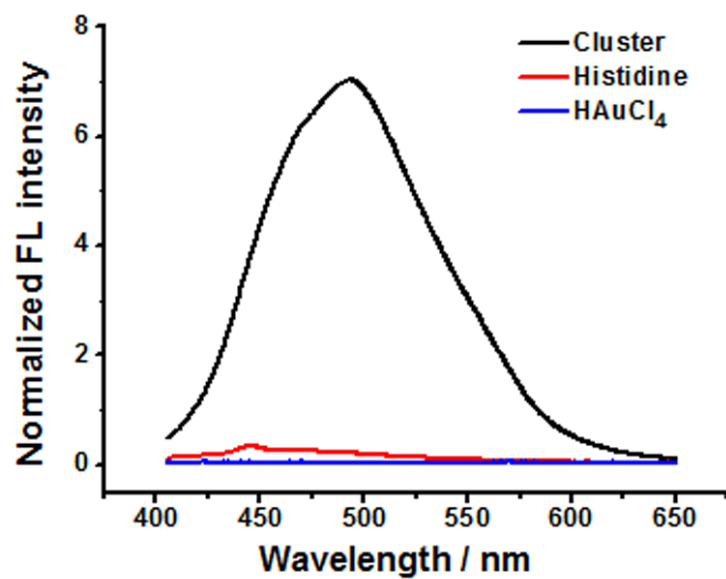

**Fig. S2.** The fluorescence spectra of the Au NCs, histidine solution and HAuCl<sub>4</sub> solution.

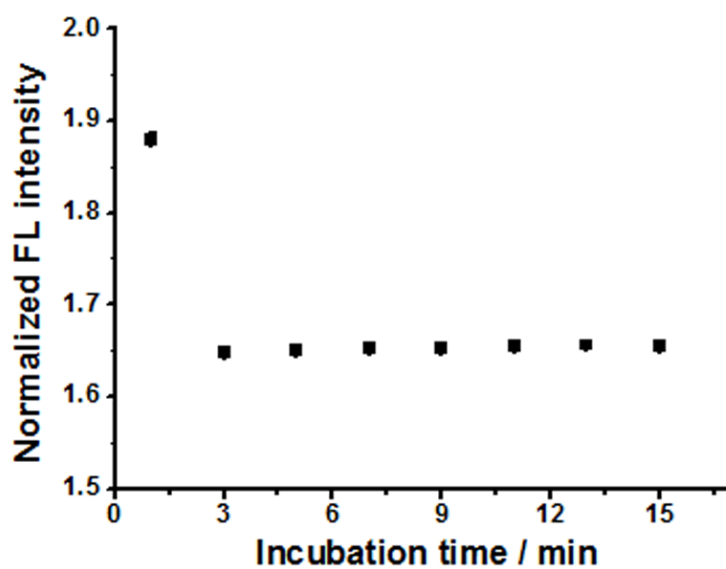

**Fig. S3.** Optimization of the incubation time for the fluorescence variation of the AuNCs in the presence of 1000.0  $\mu\text{M}$   $\text{Fe}^{3+}$  ions.

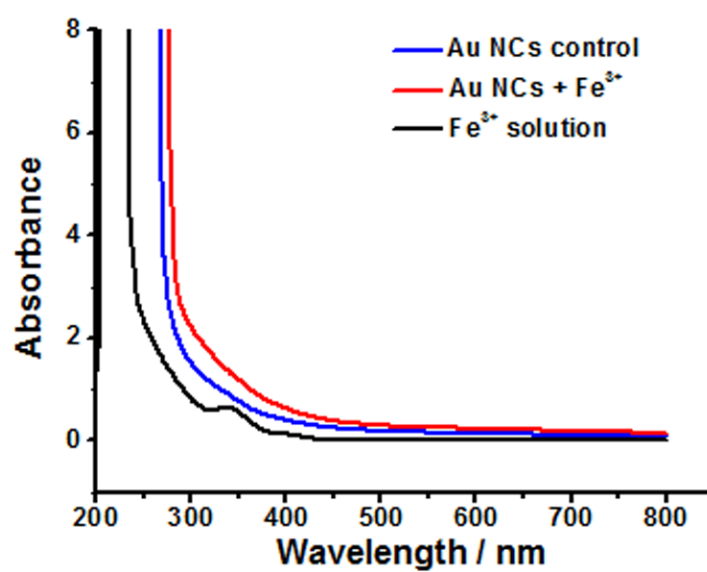

**Fig. S4.** UV/Vis absorption spectra of Fe<sup>3+</sup> solution (black line), aqueous Au NCs (blue line) and Au NCs in the presence of 500.0  $\mu$ M Fe<sup>3+</sup> ions (red line).

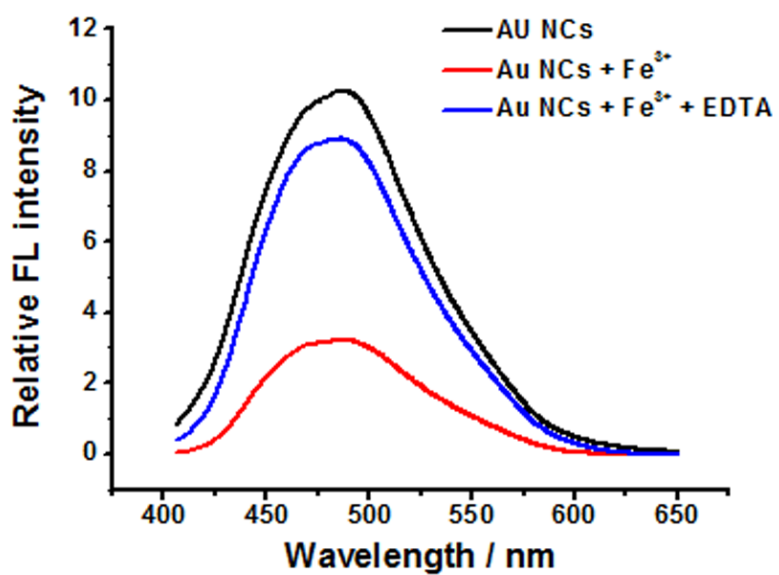

**Fig. 5.** Fluorescence spectra of the Au NCs solution (black line), in the presence of 1000.0  $\mu\text{M}$   $\text{Fe}^{3+}$  (blue line), and in the presence of 1000.0  $\mu\text{M}$  EDTA and  $\text{Fe}^{3+}$  (red line).
